# Supplementary material
Source: PubMed Central journal article supplement (PMC5999387)

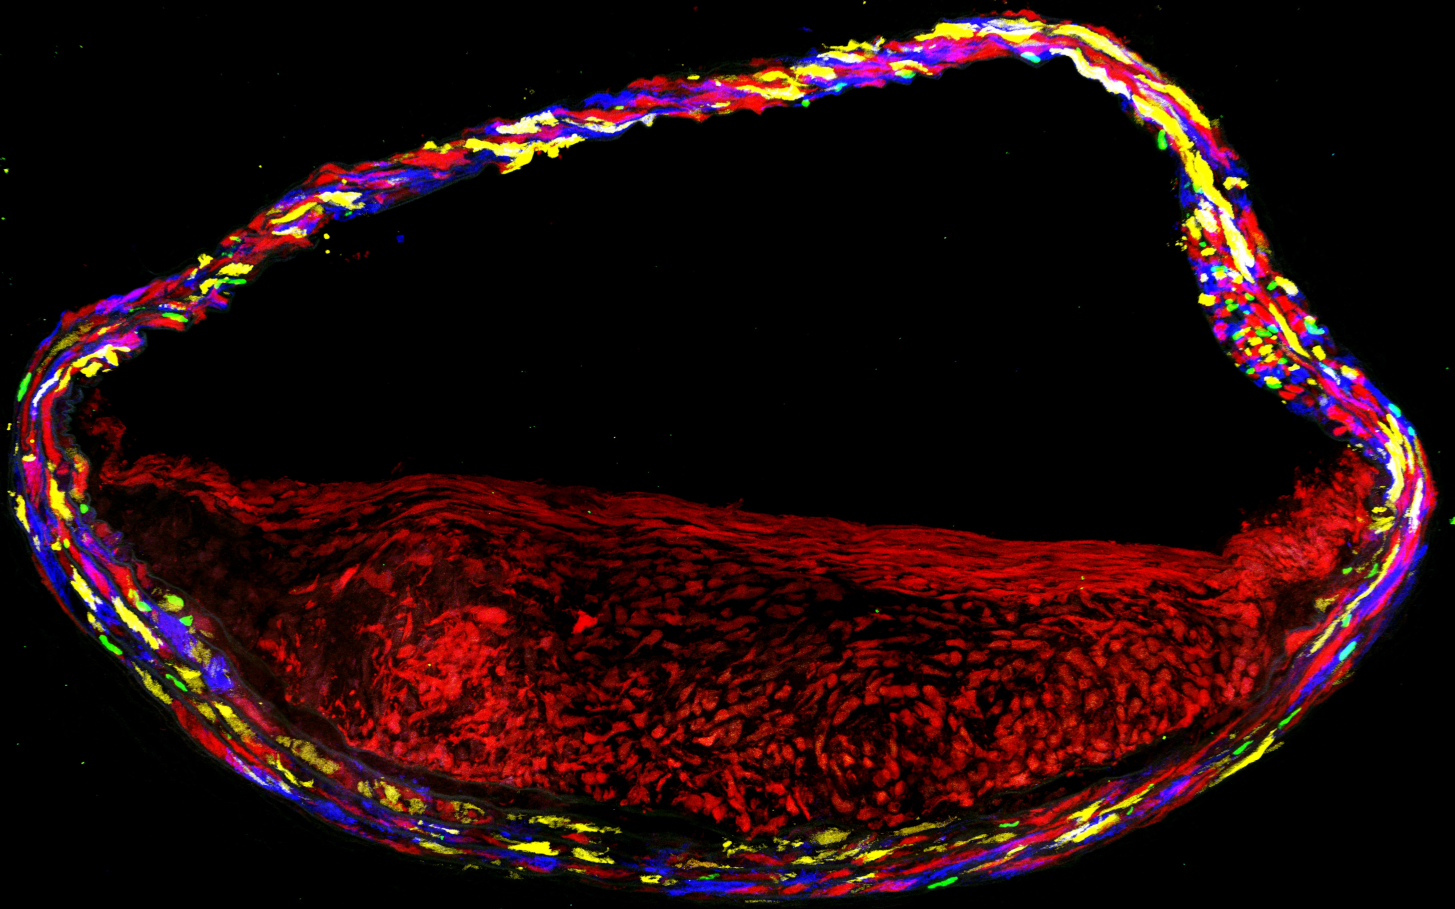

Supplement: res-119-1313-s004.pdf [file res-119-1313-s004.pdf]
