# Supplementary material
Source: PubMed Central journal article supplement (PMC5999387)
Supplement: res-119-1313-s005.pdf [file res-119-1313-s005.pdf]

#### Cover Image 1:

Maximal projection of three central scans (7  $\mu\text{m}$  apart) of a confocal Z-stack of a whole mounted carotid artery 28 days post carotid artery ligation surgery. Multi-color lineage labeling of mature vascular smooth muscle cells (VSMCs) in Myh11-CreERT2; Rosa26-Confetti mouse reveals that a low proportion of VSMCs expand to contribute to the neointima in arteries following injury. This is demonstrated by observation of large contiguous monochromatic neointimal 'patches'.

#### Cover Image 2:

Confocal micrograph of an atherosclerotic plaque within a carotid artery (20  $\mu\text{m}$  section). Multi-color lineage labeling of mature vascular smooth muscle cells (VSMCs) in Myh11-CreERT2; Rosa26-Confetti; ApoE<sup>-/-</sup> mouse reveals that a low proportion of VSMCs expand to contribute to atherosclerotic plaques following high fat diet for 16 weeks. This is demonstrated by the observation that VSMC-derived cells within the plaque are of a single color in contrast to the medial VSMCs which are mosaically labeled.
